# Supplementary material
Source: Springer Nature journal article supplement (https://www.springermedizin.de/resource/supplementary/12879_2011_2128_MOESM1_ESM.pdf/9443662)

CASE-CONTROL STUDY JULY 2005 - DEC 2006

SURVEILLANCE CULTURES MAY 2006 - JUNE 2009

INCIDENCE PER 1000 BED DAYS

|      | PICU | NU   |
|------|------|------|
| 2005 | 10.4 | 0.6  |
| 2006 | 9    | 11.5 |
| 2007 | 5.3  | 5.5  |
| 2008 | 4.1  | 3.4  |
| 2009 | 7.1  | 0.8  |

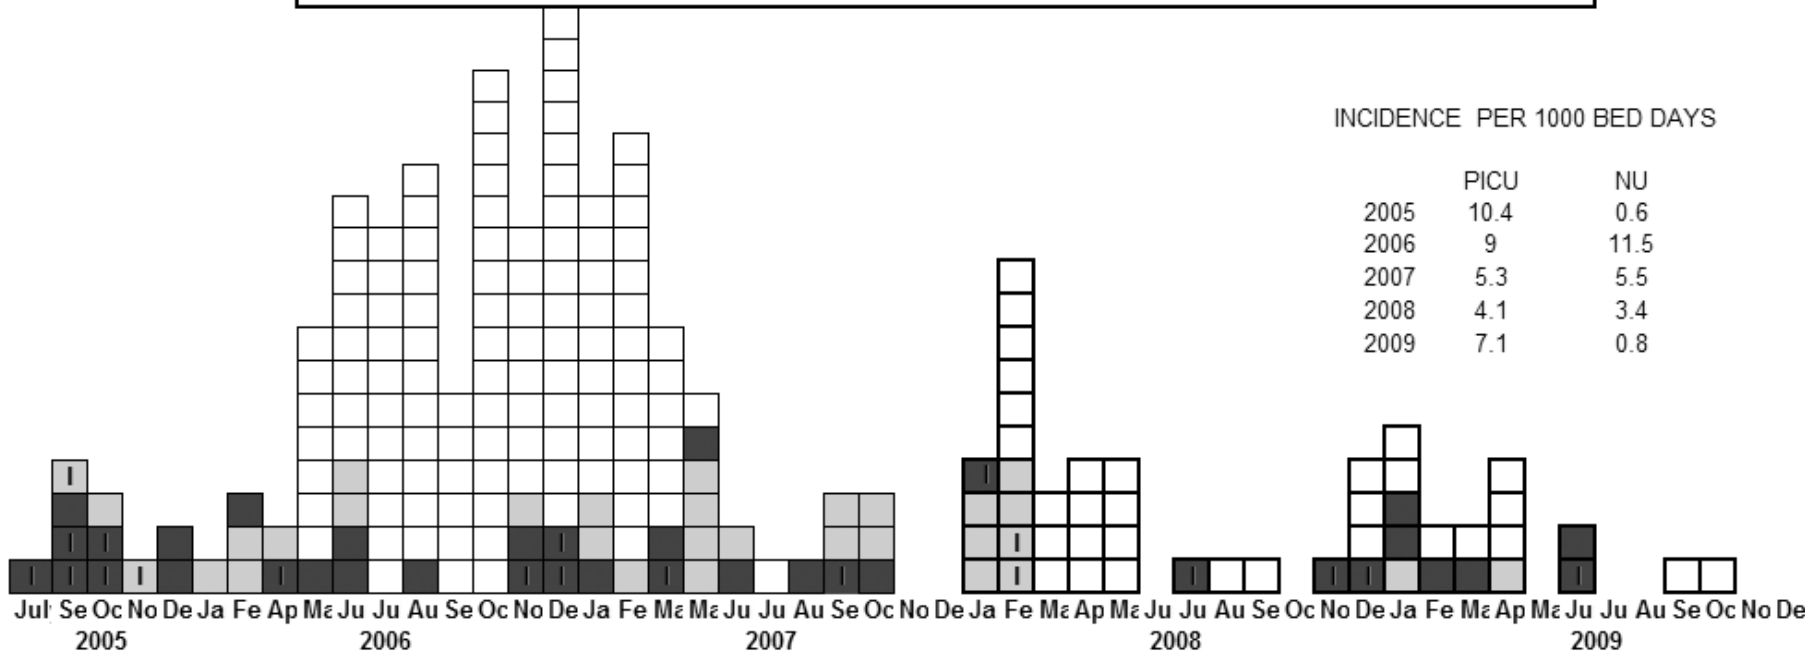

Supplement: MOESM1 [file 9443662]
